# Supplementary material for: Echo2Pheno: a deep-learning application to uncover echocardiographic phenotypes in conscious mice
Source: PubMed Central journal article supplement (PMC10290584; doi:10.1007/s00335-023-09996-x), 2023-05-23
Supplement: 335_2023_9996_MOESM1_ESM.pdf [file 335_2023_9996_MOESM1_ESM.pdf]

Figure S1

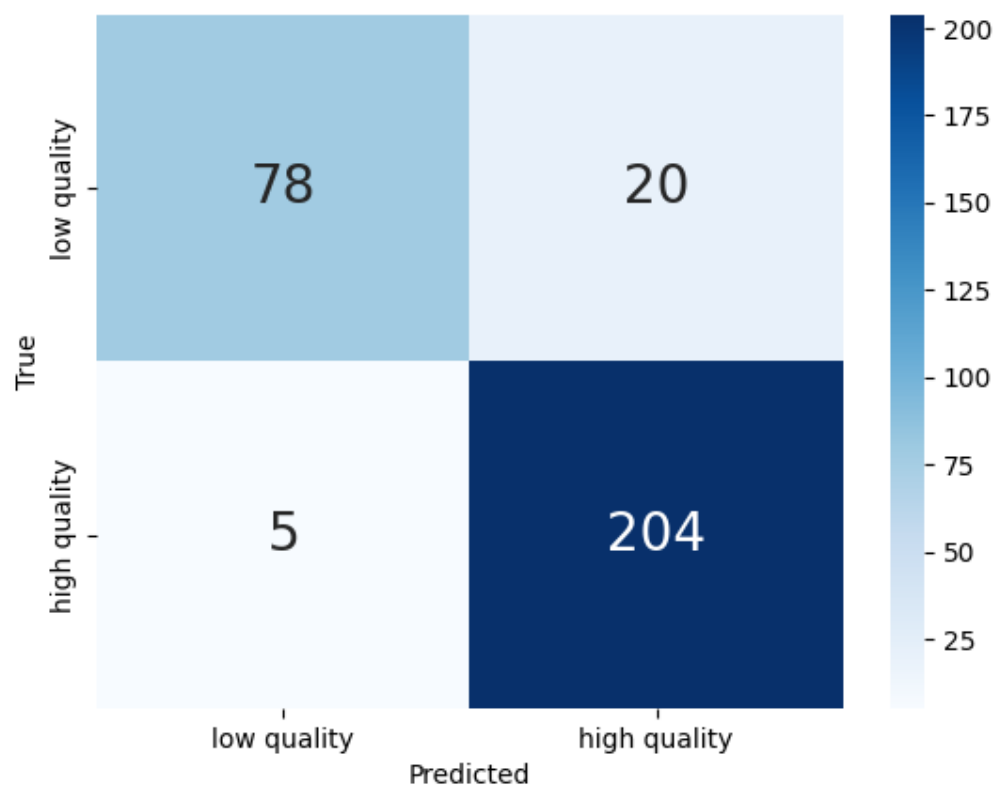

Figure S2

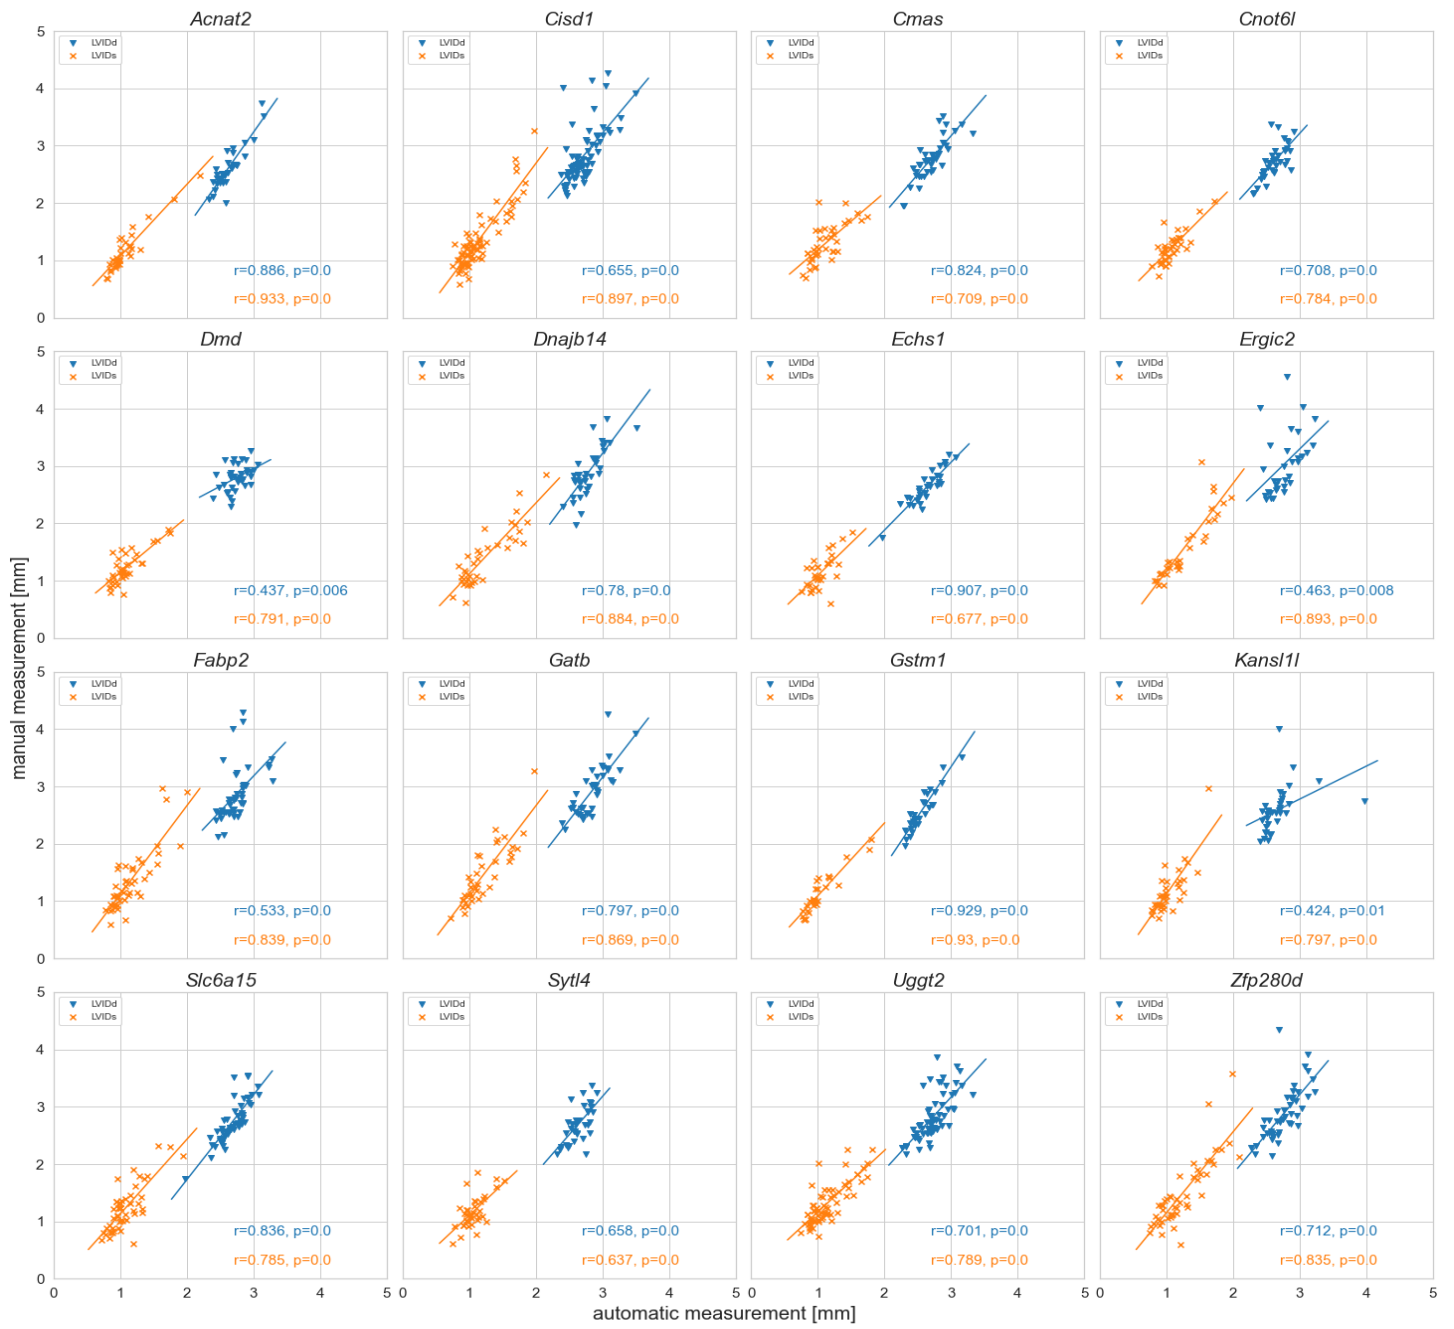

Figure S3

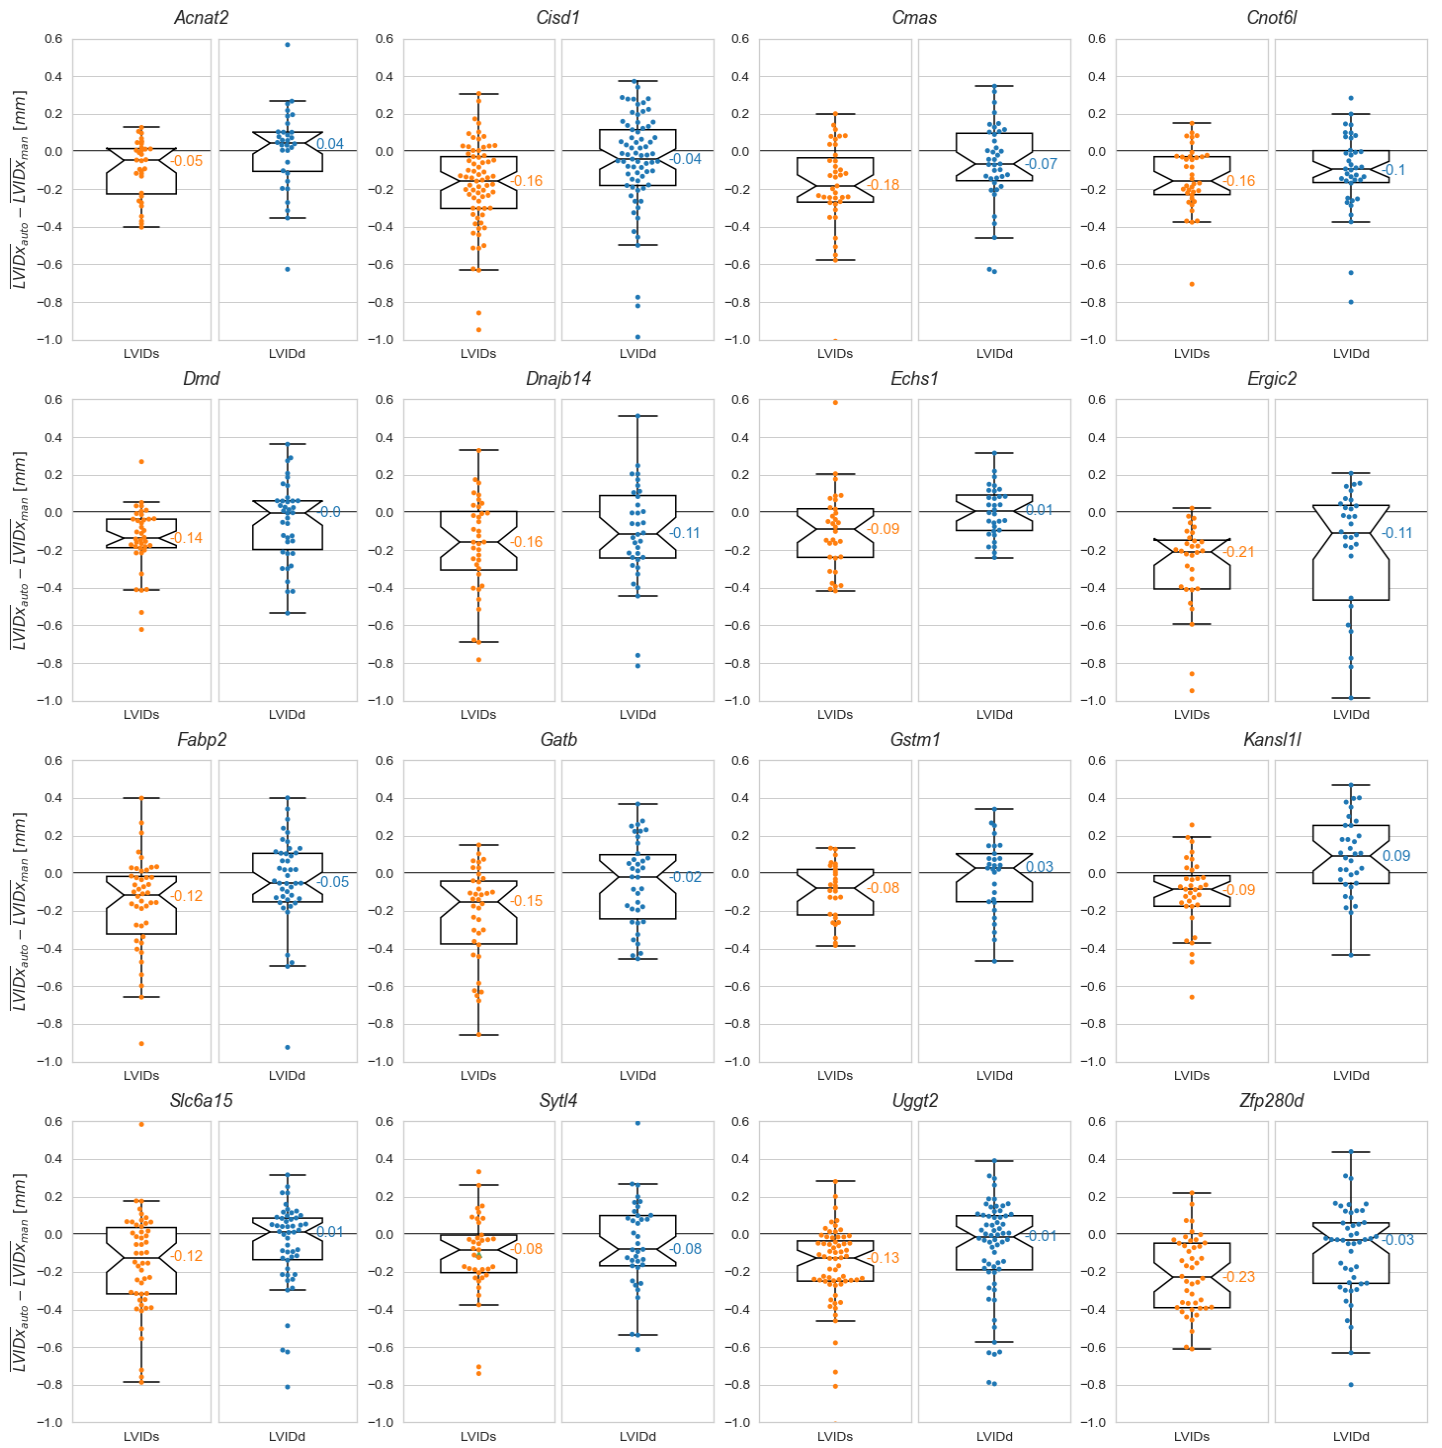

Figure S4

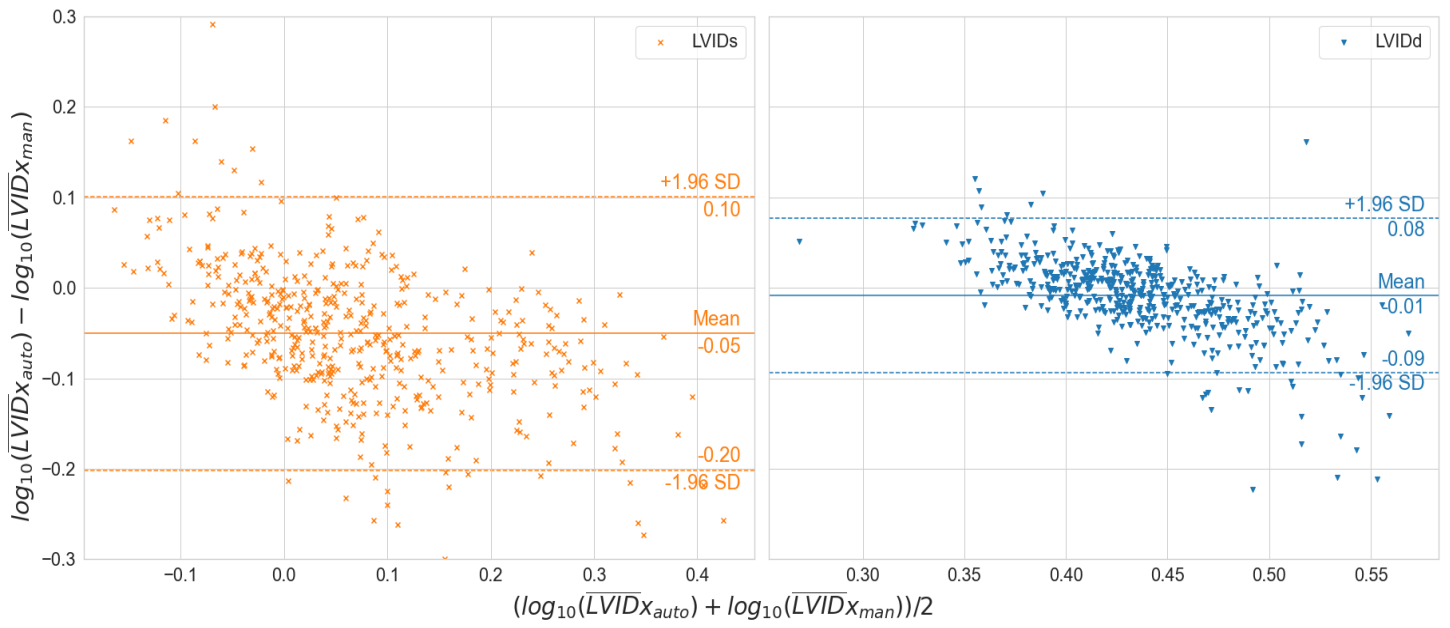

Figure S5

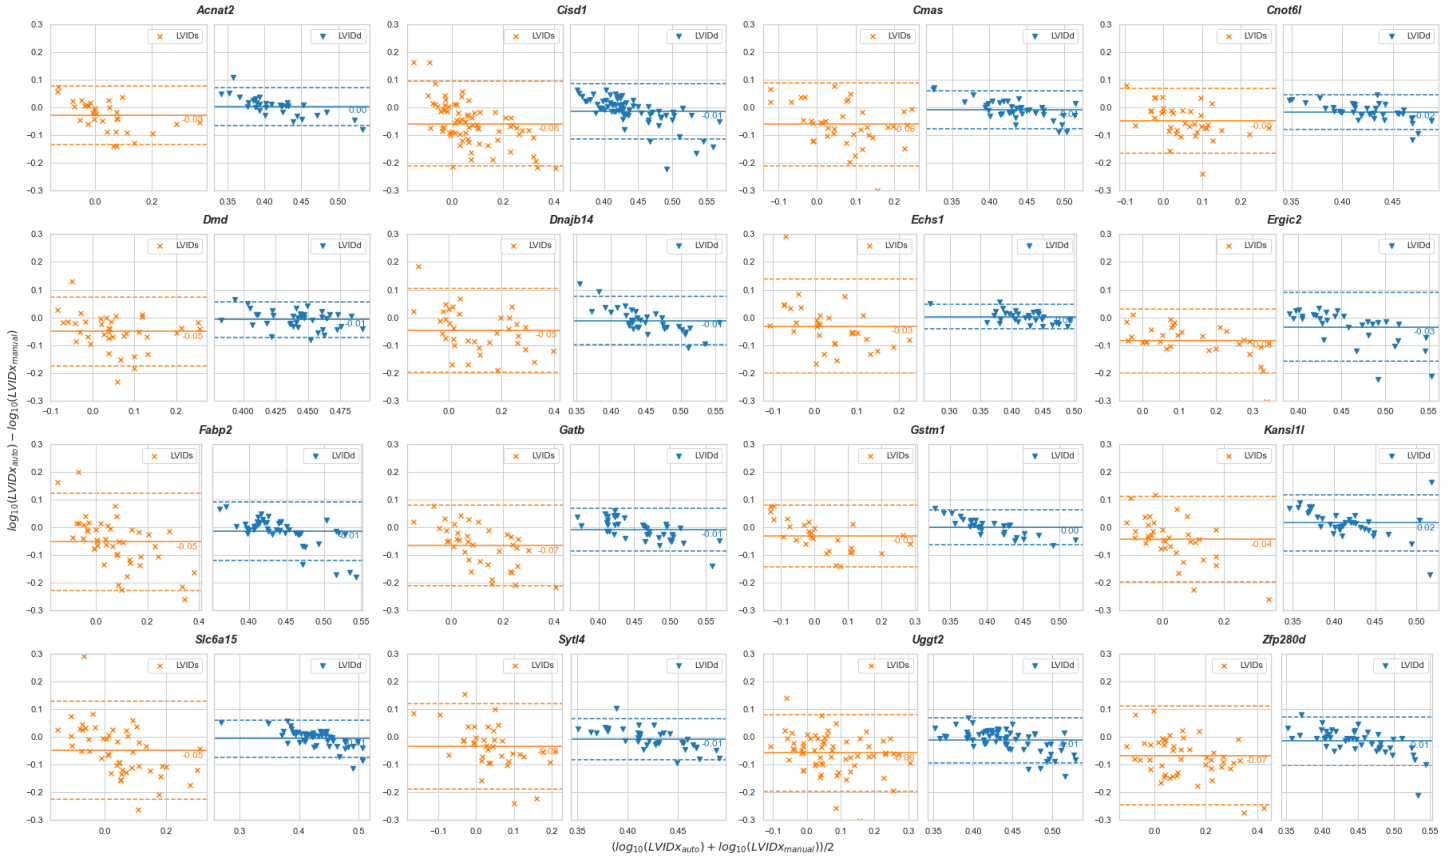

Table S1

|                |       | P         |        |        |        |
|----------------|-------|-----------|--------|--------|--------|
|                |       | Automatic |        | Manual |        |
|                |       | Male      | Female | Male   | Female |
| <i>Acnat2</i>  | LVIDs | 0.083     | 0.382  | 0.248  | 0.798  |
|                | LVIDd | 0.105     | 0.878  | 0.248  | 0.574  |
|                | EF    | 0.195     | 0.195  | 0.279  | 0.798  |
|                | FS    | 0.234     | 0.161  | 0.279  | 0.878  |
| <i>Cisd1</i>   | LVIDs | 0.002     | 0.335  | 0.013  | 0.912  |
|                | LVIDd | 0.004     | 0.786  | 0.001  | 0.506  |
|                | EF    | 0.007     | 0.574  | 0.053  | 0.814  |
|                | FS    | 0.009     | 0.266  | 0.107  | 0.814  |
| <i>Cmas</i>    | LVIDs | 0.270     | 0.273  | 0.539  | 0.076  |
|                | LVIDd | 0.967     | 0.140  | 1.000  | 0.212  |
|                | EF    | 0.270     | 0.678  | 0.270  | 0.121  |
|                | FS    | 0.236     | 0.791  | 0.236  | 0.162  |
| <i>Cnot6l</i>  | LVIDs | 0.009     | 0.031  | 0.068  | 0.140  |
|                | LVIDd | 0.515     | 0.791  | 0.563  | 0.623  |
|                | EF    | < 0.001   | 0.014  | 0.021  | 0.064  |
|                | FS    | < 0.001   | 0.021  | 0.027  | 0.064  |
| <i>Dmd</i>     | LVIDs | 0.082     | 0.034  | 0.007  | 0.068  |
|                | LVIDd | 0.571     | 0.237  | 0.335  | 0.689  |
|                | EF    | 0.016     | 0.006  | 0.003  | 0.027  |
|                | FS    | 0.002     | 0.004  | 0.003  | 0.034  |
| <i>Dnajb14</i> | LVIDs | 0.659     | 0.633  | 1.000  | 0.967  |
|                | LVIDd | 0.724     | 0.360  | 0.691  | 0.775  |
|                | EF    | 0.659     | 0.696  | 1.000  | 0.838  |
|                | FS    | 0.724     | 0.829  | 1.000  | 0.775  |
| <i>Echs1</i>   | LVIDs | 0.959     | 0.328  | 0.833  | 0.317  |
|                | LVIDd | 0.382     | 0.279  | 0.878  | 0.195  |
|                | EF    | 0.574     | 0.279  | 0.793  | 0.505  |
|                | FS    | 0.645     | 0.234  | 0.798  | 0.505  |
| <i>Ergic2</i>  | LVIDs | 0.328     | 0.798  | 0.528  | 0.674  |
|                | LVIDd | 0.195     | 0.279  | 0.505  | 0.958  |
|                | EF    | 0.645     | 1.000  | 0.645  | 0.328  |
|                | FS    | 0.574     | 0.958  | 0.645  | 0.328  |
| <i>Fabp2</i>   | LVIDs | 0.241     | 0.087  | 0.284  | 0.154  |
|                | LVIDd | 0.485     | 0.019  | 0.500  | 0.018  |
|                | EF    | 0.351     | 0.147  | 0.351  | 0.236  |
|                | FS    | 0.275     | 0.236  | 0.393  | 0.280  |

|                |       | P         |         |         |        |
|----------------|-------|-----------|---------|---------|--------|
|                |       | Automatic |         | Manual  |        |
|                |       | Male      | Female  | Male    | Female |
| <i>Gatb</i>    | LVIDs | 0.391     | 0.111   | 0.596   | 0.870  |
|                | LVIDd | 0.438     | 0.713   | 0.369   | 0.967  |
|                | EF    | 0.713     | 0.030   | 0.596   | 0.967  |
|                | FS    | 0.596     | 0.030   | 0.596   | 1.000  |
| <i>Gstm1</i>   | LVIDs | 0.867     | 1.000   | 1.000   | 0.948  |
|                | LVIDd | 0.694     | 0.662   | 0.908   | 0.796  |
|                | EF    | 0.694     | 0.491   | 0.694   | 0.950  |
|                | FS    | 0.613     | 0.573   | 0.613   | 0.950  |
| <i>Kansl1l</i> | LVIDs | 0.442     | 0.734   | 0.279   | 0.570  |
|                | LVIDd | 0.279     | 0.273   | 0.024   | 0.473  |
|                | EF    | 0.798     | 0.623   | 0.798   | 1.000  |
|                | FS    | 0.798     | 0.678   | 0.798   | 1.000  |
| <i>Slc6a15</i> | LVIDs | 0.010     | 0.977   | 0.095   | 0.910  |
|                | LVIDd | 0.350     | 0.843   | 0.282   | 0.692  |
|                | EF    | 0.007     | 0.977   | 0.165   | 0.843  |
|                | FS    | 0.012     | 0.843   | 0.183   | 0.843  |
| <i>Sytl4</i>   | LVIDs | 0.003     | 0.054   | 0.475   | 0.496  |
|                | LVIDd | 0.887     | 0.791   | 0.695   | 0.970  |
|                | EF    | 0.003     | 0.089   | 0.475   | 0.623  |
|                | FS    | 0.007     | 0.104   | 0.475   | 0.571  |
| <i>Uggt2</i>   | LVIDs | 0.245     | 0.570   | 0.035   | 0.681  |
|                | LVIDd | 0.849     | 0.953   | 0.220   | 0.469  |
|                | EF    | 0.364     | 0.142   | 0.027   | 0.829  |
|                | FS    | 0.386     | 0.132   | 0.021   | 0.710  |
| <i>Zfp280d</i> | LVIDs | <0.001    | < 0.001 | < 0.001 | 0.004  |
|                | LVIDd | 0.049     | 0.019   | < 0.001 | 0.061  |
|                | EF    | <0.001    | 0.002   | < 0.001 | 0.001  |
|                | FS    | <0.001    | 0.001   | < 0.001 | 0.001  |

Table S2

|    | <b>Study</b>           | <b>Zygoty</b> | <b>Background</b> | <b>Sex</b> | <b>Genotype</b> | <i>bw</i> [g] | <b>Use</b> |
|----|------------------------|---------------|-------------------|------------|-----------------|---------------|------------|
| 1  | <b><i>Arvcf</i></b>    | homozygous    | C57BL/6N          | f          | control         | 22.20         | train      |
| 2  |                        | homozygous    | C57BL/6N          | f          | control         | 28.10         | train      |
| 3  |                        | homozygous    | C57BL/6N          | f          | control         | 25.40         | test       |
| 4  |                        | heterozygous  | C57BL/6N          | f          | mutant          | 23.10         | train      |
| 5  |                        | heterozygous  | C57BL/6N          | f          | mutant          | 24.10         | train      |
| 6  | <b><i>Anpep</i></b>    | homozygous    | C57BL/6N          | m          | control         | 28.60         | train      |
| 7  |                        | homozygous    | C57BL/6N          | m          | mutant          | 31.70         | train      |
| 8  |                        | homozygous    | C57BL/6N          | m          | mutant          | 36.40         | train      |
| 9  | <b><i>Cenpv</i></b>    | homozygous    | C57BL/6N          | m          | control         | 31.70         | train      |
| 10 |                        | homozygous    | C57BL/6N          | m          | control         | 31.50         | train      |
| 11 |                        | homozygous    | C57BL/6N          | f          | mutant          | 22.20         | train      |
| 12 |                        | homozygous    | C57BL/6N          | f          | mutant          | 24.40         | train      |
| 13 | <b><i>Crygn</i></b>    | homozygous    | C57BL/6N          | m          | control         | 26.70         | train      |
| 14 |                        | homozygous    | C57BL/6N          | f          | control         | 21.30         | test       |
| 15 |                        | homozygous    | C57BL/6N          | m          | control         | 27.30         | test       |
| 16 |                        | homozygous    | C57BL/6N          | f          | mutant          | 21.20         | train      |
| 17 | <b><i>Dmd</i></b>      | homozygous    | C57BL/6N          | m          | control         | 26.90         | train      |
| 18 |                        | homozygous    | C57BL/6N          | f          | control         | 22.60         | train      |
| 19 |                        | hemizygous    | C57BL/6N          | m          | mutant          | 23.90         | train      |
| 20 |                        | homozygous    | C57BL/6N          | f          | mutant          | 25.00         | train      |
| 21 |                        | hemizygous    | C57BL/6N          | m          | mutant          | 25.70         | train      |
| 22 | <b><i>Slc6a15</i></b>  | homozygous    | C57BL/6N          | f          | control         | 26.80         | train      |
| 23 |                        | homozygous    | C57BL/6N          | m          | control         | 32.10         | train      |
| 24 |                        | homozygous    | C57BL/6N          | f          | mutant          | 25.00         | train      |
| 25 | <b><i>Slc25a12</i></b> | homozygous    | C57BL/6N          | m          | control         | 26.80         | train      |
| 26 |                        | homozygous    | C57BL/6N          | f          | control         | 23.10         | train      |
| 27 |                        | homozygous    | C57BL/6N          | f          | control         | 21.30         | train      |
| 28 |                        | homozygous    | C57BL/6N          | m          | control         | 24.20         | train      |
| 29 |                        | homozygous    | C57BL/6N          | f          | control         | 19.40         | train      |
| 30 |                        | heterozygous  | C57BL/6N          | m          | mutant          | 22.20         | train      |
| 31 |                        | heterozygous  | C57BL/6N          | f          | mutant          | 20.30         | train      |
| 32 |                        | heterozygous  | C57BL/6N          | f          | mutant          | 23.60         | train      |
| 33 |                        | heterozygous  | C57BL/6N          | f          | mutant          | 21.80         | train      |
| 34 |                        | heterozygous  | C57BL/6N          | m          | mutant          | 23.30         | train      |
| 35 |                        | heterozygous  | C57BL/6N          | m          | mutant          | 21.70         | train      |
| 36 |                        | heterozygous  | C57BL/6N          | m          | mutant          | 26.70         | train      |
| 37 |                        | heterozygous  | C57BL/6N          | f          | mutant          | 23.10         | train      |
| 38 |                        | heterozygous  | C57BL/6N          | m          | mutant          | 24.40         | train      |
| 39 |                        | heterozygous  | C57BL/6N          | f          | mutant          | 19.50         | train      |
| 40 |                        | heterozygous  | C57BL/6N          | m          | mutant          | 24.20         | train      |
| 41 |                        | heterozygous  | C57BL/6N          | f          | mutant          | 19.80         | test       |

|    | <b>Study</b>             | <b>Zygoty</b> | <b>Background</b> | <b>Sex</b> | <b>Genotype</b> | <i>bw</i> [g] | <b>Use</b> |
|----|--------------------------|---------------|-------------------|------------|-----------------|---------------|------------|
| 42 | <b><i>Shisal2a</i></b>   | homozygous    | C57BL/6N          | m          | control         | 24.90         | train      |
| 43 |                          | homozygous    | C57BL/6N          | m          | control         | 24.90         | train      |
| 44 |                          | homozygous    | C57BL/6N          | f          | control         | 17.30         | test       |
| 45 |                          | homozygous    | C57BL/6N          | f          | mutant          | 17.90         | train      |
| 46 |                          | homozygous    | C57BL/6N          | m          | mutant          | 26.90         | test       |
| 47 | <b><i>Epigenetic</i></b> | homozygous    | C57BL/6N          | m          | control         | 28.30         | train      |
| 48 |                          | homozygous    | C57BL/6N          | m          | control         | 28.30         | train      |
| 49 |                          | homozygous    | C57BL/6N          | m          | control         | 28.10         | train      |
| 50 |                          | homozygous    | C57BL/6N          | m          | control         | 26.60         | train      |
| 51 |                          | homozygous    | C57BL/6N          | f          | control         | 24.00         | train      |
| 52 |                          | homozygous    | C57BL/6N          | f          | control         | 21.80         | train      |
| 53 |                          | homozygous    | C57BL/6N          | m          | control         | 27.90         | train      |
| 54 |                          | homozygous    | C57BL/6N          | f          | control         | 22.30         | train      |
| 55 |                          | homozygous    | C57BL/6N          | f          | control         | 22.50         | train      |
| 56 |                          | homozygous    | C57BL/6N          | f          | control         | 23.30         | test       |
| 57 |                          | homozygous    | C57BL/6N          | m          | control         | 22.20         | test       |



Table S3

|                       | <b>Zygoty</b>    | <b>Background</b> | <b>Sex</b> | <b>Genotype</b> | $\bar{bw}[g]$ | <b>No.</b> |
|-----------------------|------------------|-------------------|------------|-----------------|---------------|------------|
| <b><i>Acnat2</i></b>  | heterozygous     | C57BL/6N          | f          | control         | 21.76         | 8          |
|                       |                  |                   |            | mutant          | 21.65         | 8          |
|                       |                  |                   | m          | control         | 26.83         | 8          |
|                       |                  |                   |            | mutant          | 27.63         | 8          |
| <b><i>Cisd1</i></b>   | homozygous       | C57BL/6N          | f          | control         | 22.45         | 29         |
|                       |                  |                   |            | mutant          | 22.10         | 8          |
|                       |                  |                   | m          | control         | 27.13         | 28         |
|                       |                  |                   |            | mutant          | 24.64         | 8          |
| <b><i>Cmas</i></b>    | heterozygous     | C57BL/6N          | f          | control         | 21.62         | 10         |
|                       |                  |                   |            | mutant          | 22.26         | 10         |
|                       |                  |                   | m          | control         | 26.02         | 10         |
|                       |                  |                   |            | mutant          | 27.93         | 9          |
| <b><i>Cnot6l</i></b>  | homozygous       | C57BL/6N          | f          | control         | 21.84         | 10         |
|                       |                  |                   |            | mutant          | 21.03         | 10         |
|                       |                  |                   | m          | control         | 27.03         | 10         |
|                       |                  |                   |            | mutant          | 24.69         | 8          |
| <b><i>Dmd</i></b>     | hemi-/homozygous | C57BL/6N          | f          | control         | 21.83         | 10         |
|                       |                  |                   |            | mutant          | 25.21         | 8          |
|                       |                  |                   | m          | control         | 27.16         | 12         |
|                       |                  |                   |            | mutant          | 27.98         | 8          |
| <b><i>Dnajb14</i></b> | heterozygous     | C57BL/6N          | f          | control         | 22.60         | 9          |
|                       |                  |                   |            | mutant          | 21.48         | 10         |
|                       |                  |                   | m          | control         | 27.33         | 9          |
|                       |                  |                   |            | mutant          | 27.10         | 9          |
| <b><i>Echs1</i></b>   | heterozygous     | C57BL/6N          | f          | control         | 22.31         | 8          |
|                       |                  |                   |            | mutant          | 23.09         | 8          |
|                       |                  |                   | m          | control         | 27.14         | 8          |
|                       |                  |                   |            | mutant          | 28.75         | 8          |
| <b><i>Ergic</i></b>   | heterozygous     | C57BL/6N          | f          | control         | 22.01         | 8          |
|                       |                  |                   |            | mutant          | 23.04         | 8          |
|                       |                  |                   | m          | control         | 26.66         | 8          |
|                       |                  |                   |            | mutant          | 28.20         | 8          |
| <b><i>Fabp2</i></b>   | homozygous       | C57BL/6N          | f          | control         | 21.93         | 16         |
|                       |                  |                   |            | mutant          | 21.39         | 10         |
|                       |                  |                   | m          | control         | 26.42         | 13         |
|                       |                  |                   |            | mutant          | 25.20         | 7          |
| <b><i>Gatb</i></b>    | heterozygous     | C57BL/6N          | f          | control         | 21.81         | 10         |
|                       |                  |                   |            | mutant          | 22.16         | 9          |
|                       |                  |                   | m          | control         | 27.32         | 10         |
|                       |                  |                   |            | mutant          | 26.30         | 9          |

|                       | <b>Zygoty</b> | <b>Background</b> | <b>Sex</b> | <b>Genotype</b> | $\overline{bw}[g]$ | <b>No.</b> |
|-----------------------|---------------|-------------------|------------|-----------------|--------------------|------------|
| <b><i>Gstm1</i></b>   | homozygous    | C57BL/6N          | f          | control         | 21.76              | 8          |
|                       |               |                   |            | mutant          | 21.42              | 6          |
|                       |               |                   | m          | control         | 26.83              | 8          |
|                       |               |                   |            | mutant          | 25.67              | 7          |
| <b><i>Kansl1l</i></b> | homozygous    | C57BL/6N          | f          | control         | 21.11              | 10         |
|                       |               |                   |            | mutant          | 20.97              | 10         |
|                       |               |                   | m          | control         | 26.35              | 8          |
|                       |               |                   |            | mutant          | 24.96              | 8          |
| <b><i>Slc6a15</i></b> | homozygous    | C57BL/6N          | f          | control         | 23.59              | 16         |
|                       |               |                   |            | mutant          | 23.46              | 10         |
|                       |               |                   | m          | control         | 27.90              | 16         |
|                       |               |                   |            | mutant          | 27.43              | 9          |
| <b><i>Sytl4</i></b>   | homozygous    | C57BL/6N          | f          | control         | 21.84              | 10         |
|                       |               |                   |            | mutant          | 22.04              | 10         |
|                       |               |                   | m          | control         | 27.03              | 10         |
|                       |               |                   |            | mutant          | 27.61              | 7          |
| <b><i>Uggt2</i></b>   | homozygous    | C57BL/6N          | f          | control         | 21.73              | 23         |
|                       |               |                   |            | mutant          | 21.58              | 10         |
|                       |               |                   | m          | control         | 26.40              | 21         |
|                       |               |                   |            | mutant          | 26.36              | 10         |
| <b><i>Zfp280d</i></b> | homozygous    | C57BL/6N          | f          | control         | 22.25              | 15         |
|                       |               |                   |            | mutant          | 21.75              | 8          |
|                       |               |                   | m          | control         | 26.97              | 17         |
|                       |               |                   |            | mutant          | 23.98              | 10         |
